# Supplementary material for: Mapping of infection prevention and control education and training in some countries of the World Health Organization’s Eastern Mediterranean Region: current situation and future needs
Source: Springer Nature journal article supplement (doi:10.1186/s13756-023-01299-9), 2023-09-04
Supplement: MOESM1 [file 13756_2023_1299_MOESM1_ESM.pdf]

**Infection prevention and control (IPC) education and training in countries of the WHO EMRO: Mapping the current situation and future needs**

**Questionnaire:**

1. IPC Undergraduate education
  - 1.1. Is IPC (courses, modules, etc) included in undergraduate education of medical/dental and paramedical specialties (nursing, pharmacy, laboratory, etc)?  
Yes/No
  - 1.2. Is this education related to IPC among educational institutions homogenous/similar, i.e. one similar curriculum exists? Yes/No
  - 1.3. Are there national IPC undergraduate curricula for the different medical and paramedical specialties that are developed in collaboration with local academic institutions, and adopted by them? Yes/No
  - 1.4. Are these national IPC undergraduate curricula currently taught to undergraduate students in the educational facilities? Yes/No
2. IPC Postgraduate education
  - 2.1. Is IPC being taught as a stand-alone subspecialty? Yes/No
  - 2.2. Are there higher education degrees MSc or PhD in IPC available? Yes/No
  - 2.3. Are there national IPC postgraduate and in-service curricula that are developed in collaboration with local academic institutions for IPC professionals:
    - 2.3.1. IPC physician Yes/No
    - 2.3.2. IPC non-physician (nurses, etc.) Yes/No
  - 2.4. Is there a national recognition for IPC postgraduate programs? (Are they mentioned in accreditation criteria, job description of IPC professionals, etc.)?  
Yes/No
3. Postgraduate training opportunities and availability for different medical and paramedical healthcare professionals
  - 3.1. For physicians
    - 3.1.1. At the national level, Yes/No
    - 3.1.2. At the healthcare facility level, Yes/No
  - 3.2. For link nurses or champions
    - 3.2.1. At the national level, Yes/No
    - 3.2.2. At the healthcare facility level, Yes/No
  - 3.3. For nurses, pharmacists, laboratory personnel and other healthcare workers
    - 3.3.1. At the national level, Yes/No
    - 3.3.2. At the healthcare facility level, Yes/No
4. Is it mandatory to have an IPC team in every healthcare facility? Yes/No

5. Is healthcare facility training homogenous among all healthcare facilities in the country? **Yes/No**
6. Is this healthcare facility training based on a standardized national curriculum? **Yes/No**
7. Education requirements of IPC professionals in healthcare facilities:
  - 7.1. IPC physicians should be specialized in ID or medical microbiology or other physicians can be IPC physician, no need for further certification. **Yes/No**
  - 7.2. IPC physicians should have a certified training in IPC . **Yes/No**
  - 7.3. IPC nurses are requested to be specialized in IPC (have a degree in IPC or followed a nationally recognized official training). **Yes/No**
  - 7.4. Any competent nurse can be employed as IPC professional. **Yes/No**
8. Training availability and format for IPC professionals (nurses and physicians):
  - 8.1. At the national level, **Yes/No**
  - 8.2. At the healthcare facility level, **Yes/No**
  - 8.3. Provided by NGOs like WHO, UNICEF, or others, **Yes/No**
  - 8.4. Online training, **Yes/No**
  - 8.5. Funded training, **Yes/No**
  - 8.6. Self-learning on the job, **Yes/No**
9. Training format for IPC nurses
  - 9.1. National periodic training courses **Yes/No**
  - 9.2. Structured scientific societies training courses **Yes/No**
  - 9.3. NGO training courses. **Yes/No**
10. Training format for other healthcare workers
  - 10.1. At the national level, **Yes/No**
  - 10.2. At the healthcare facility level, **Yes/No**
  - 10.3. Single seminar/lecture, **Yes/No**
  - 10.4. Upon employment only, **Yes/No**
  - 10.5. Upon employment and periodic, **Yes/No**
11. Are IPC courses/seminars available by scientific societies in the country? **Yes/No**
12. Are IPC courses/seminars available by NGOs in the country? **Yes/No**
13. What do you think are the local needs for IPC education and training at all levels?
